# Supplementary material for: A 30 m annual maize phenology dataset from 1985 to 2020 in China
Source: Copernicus journal article supplement (doi:10.5194/essd-14-2851-2022), 2022-06-23
Supplement: Supplementary file 1 [file essd-14-2851-2022-supplement.pdf]

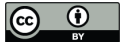

*Supplement of*

## **A 30 m annual maize phenology dataset from 1985 to 2020 in China**

**Quandi Niu et al.**

*Correspondence to:* Jianxi Huang (jxhuang@cau.edu.cn)

The copyright of individual parts of the supplement might differ from the article licence.

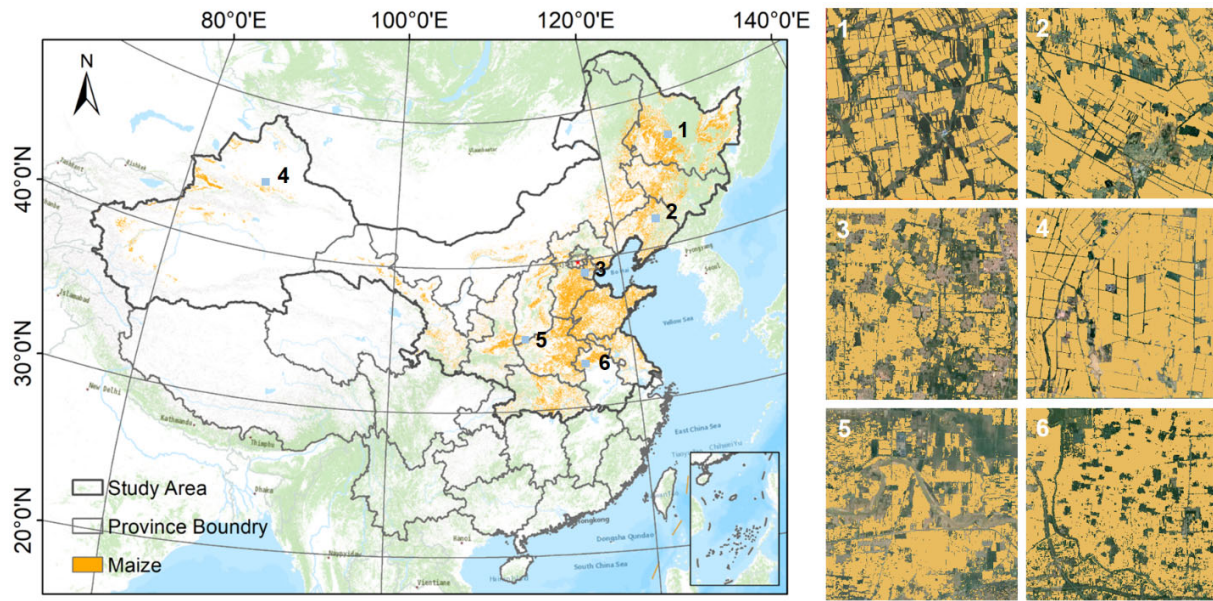

**Fig. S1:** Distribution of maize within the study area and we provided the detailed maize map at six different sites. The base map of the figure is from ESRI.

**Table S1** The selected three representative cases of phenology comparison between MODIS and Landsat derived results.

| Site | Midgreendown |      | Dormancy |       | Senescence |       |
|------|--------------|------|----------|-------|------------|-------|
|      | R            | RMSE | R        | RMSE  | R          | RMSE  |
| 1    | 0.68         | 3.35 | 0.66     | 24.82 | 0.57       | 27.13 |
| 2    | 0.84         | 3.70 | 0.87     | 24.44 | 0.47       | 25.35 |
| 3    | 0.64         | 4.54 | 0.43     | 19.35 | 0.56       | 18.17 |
